# Supplementary material
Source: publisher figshare collection journal article supplement (https://acs.figshare.com/ndownloader/files/17552843)
Supplement: Supplementary file 1 [file 17552843]

## Sheet: Sheet1
Table S6. Quantitative results of the standard glycoproteins
Protein access number	Protein name	Peptide sequence	Minimum CV	Max CV	Slope	Y intercept	X intercept
			(n=4)	(n=4)		(X=0)	(Y=0)
P00004	Cytochrome c	TGQAPGFTYTDANK	0.0113	0.0324	0.7249±0.008964	0.1358±0.03867	-0.1874
P00004	Cytochrome c	EDLIAYLK	0.0048	0.0794	0.8169±0.011353	0.1472±0.04898	-0.1802
P00433	Peroxidase C1A	DTIVNELR	0.0045	0.0135	0.7665±0.007402	0.1510±0.03194	-0.1970
P00433	Peroxidase C1A	YYVNLEEQK	0.0178	0.0712	0.7126±0.007811	0.1361±0.03370	-0.1909
P01012	Ovalbumin	GGLEPINFQTAADQAR	0.0165	0.0283	0.7094±0.009087	0.1773±0.03921	-0.2499
P01012	Ovalbumin	ELINSWVESQTNGIIR	0.0228	0.0586	0.6823±0.01075	0.1926±0.04640	-0.2822
P01012	Ovalbumin	HIATNAVLFFGR	0.0281	0.0897	0.5974±0.009223	0.1885±0.03979	-0.3156
P01867	Ig gamma-2B chain C region	APQVYILPPPAEQLSR	0.0194	0.15	0.7978±0.01516	0.2502±0.06542	-0.3135
P12763	Alpha-2-HS-glycoprotein	TPIVGQPSIPGGPVR	0.0056	0.0241	0.7431±0.009411	0.1740±0.04060	-0.2342
Q58D62	Fetuin-B	VVVLPFPSK	0.026	0.1667	0.6668±0.01101	0.2366±0.04752	-0.3548
